# Supplementary material
Source: PubMed Central journal article supplement (PMC6311388)
Supplement: NIHMS1000802-supplement-Supp.pdf [file NIHMS1000802-supplement-Supp.pdf]

# Supporting information for: Selective Permeability of Carboxysome Shell Pores to Anionic Molecules

Paween Mahinthichaichan,<sup>†,⊥</sup> Dylan M. Morris,<sup>‡,⊥</sup> Yi Wang,<sup>¶</sup> Grant J.  
Jensen,<sup>\*,§,||</sup> and Emad Tajkhorshid<sup>\*,†</sup>

<sup>†</sup>*Department of Biochemistry, NIH Center for Macromolecular Modeling and  
Bioinformatics, Center for Biophysics and Quantitative Biology, Beckman Institute for  
Advanced Science and Technology, University of Illinois at Urbana-Champaign, Urbana,  
Illinois 61801-3028, United States*

<sup>‡</sup>*Division of Biology and Biological Engineering, California Institute of Technology,  
Pasadena, California 91125, United States*

<sup>¶</sup>*Department of Physics, The Chinese University of Hong Kong, Shatin, New Territories,  
Hong Kong SAR, The People's Republic of China*

<sup>§</sup>*Division of Biology and Biological Engineering, California Institute of Technology,  
California Institute of Technology, Pasadena, California 91125, United States*

<sup>||</sup>*Howard Hughes Medical Institute, California Institute of Technology, Pasadena,  
California 91125, United States*

<sup>⊥</sup>*Equal contribution*

E-mail: jensen@caltech.edu; emad@life.illinois.edu

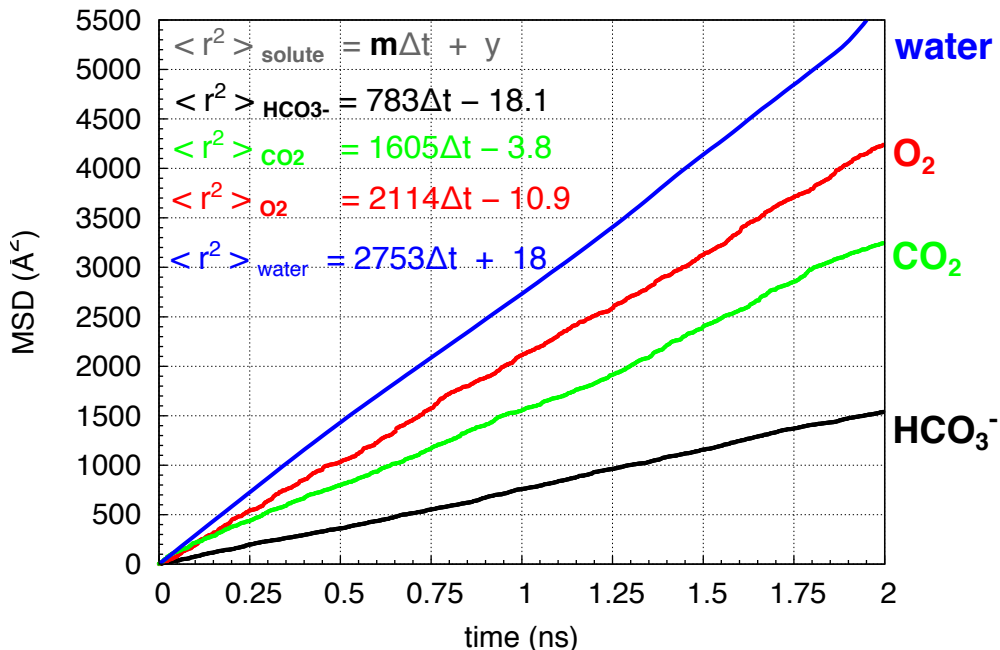

Figure S1: Cumulative displacement profiles of substrate molecules in the aqueous solution. Each individual substrate molecule was simulated independently in a  $30 \times 30 \times 30 \text{ \AA}^3$  water box ionized with 0.2 M NaCl. Its mean square displacements ( $\langle r^2 \rangle$ ) were integrated over a 2-ns equilibrated period, and were fitted using linear regression. Since no external restraint was applied on the molecule, the diffusion coefficient ( $D$ ) is equal to  $\langle r^2 \rangle / 6\Delta t = m / 6$ . The calculations yielded  $D = 1.31 \times 10^{-5} \text{ cm}^2/\text{s}$  for  $\text{HCO}_3^-$ ,  $2.68 \times 10^{-5} \text{ cm}^2/\text{s}$  for  $\text{CO}_2$ ,  $3.52 \times 10^{-5} \text{ cm}^2/\text{s}$  for  $\text{O}_2$  and  $4.58 \times 10^{-5} \text{ cm}^2/\text{s}$  for water.

Table S1: Translocational diffusion coefficients ( $D_z$ ) in the aqueous solution obtained from umbrella sampling simulations

|                  | <b>CsoS1A</b>                                        | <b>CcmK4</b>                                         |
|------------------|------------------------------------------------------|------------------------------------------------------|
| $\text{HCO}_3^-$ | $1.38 \pm 0.28 \times 10^{-5} \text{ cm}^2/\text{s}$ | $1.64 \pm 0.19 \times 10^{-5} \text{ cm}^2/\text{s}$ |
| $\text{CO}_2$    | $3.36 \pm 0.41 \times 10^{-5} \text{ cm}^2/\text{s}$ | $3.47 \pm 0.57 \times 10^{-5} \text{ cm}^2/\text{s}$ |
| $\text{O}_2$     | $4.38 \pm 0.32 \times 10^{-5} \text{ cm}^2/\text{s}$ | $5.28 \pm 1.47 \times 10^{-5} \text{ cm}^2/\text{s}$ |
| water            | $6.02 \pm 0.99 \times 10^{-5} \text{ cm}^2/\text{s}$ | $6.54 \pm 0.59 \times 10^{-5} \text{ cm}^2/\text{s}$ |

$D_z$  were calculated from the integral over the autocorrelation function of the applied restrained forces.

Table S2: Lateral diffusion coefficients ( $D_{xy}$ ) in the aqueous solution obtained from umbrella sampling simulations

|                  | <b>CsoS1A</b>                                        | <b>CcmK4</b>                                         |
|------------------|------------------------------------------------------|------------------------------------------------------|
| $\text{HCO}_3^-$ | $1.13 \pm 0.16 \times 10^{-5} \text{ cm}^2/\text{s}$ | $1.5 \pm 0.17 \times 10^{-5} \text{ cm}^2/\text{s}$  |
| $\text{CO}_2$    | $3.15 \pm 0.42 \times 10^{-5} \text{ cm}^2/\text{s}$ | $3.1 \pm 0.38 \times 10^{-5} \text{ cm}^2/\text{s}$  |
| $\text{O}_2$     | $3.67 \pm 0.48 \times 10^{-5} \text{ cm}^2/\text{s}$ | $3.9 \pm 0.54 \times 10^{-5} \text{ cm}^2/\text{s}$  |
| water            | $4.9 \pm 1.1 \times 10^{-5} \text{ cm}^2/\text{s}$   | $5.52 \pm 1.38 \times 10^{-5} \text{ cm}^2/\text{s}$ |

$D_{xy}$  were calculated from the mean square displacement along the x and y axes, defined as  $\langle \Delta x^2 + \Delta y^2 \rangle / 4\Delta t$ .  $D_z$  and  $D_{xy}$  were the averages of those taken at  $z < -12.5 \text{ \AA}$  with respect to the center of the central pores. Overall, these values are not significantly deviated from those calculated from equilibrium simulation (Fig. S1).
